# Supplementary material
Source: PubMed Central journal article supplement (PMC5838803)
Supplement: jamaneurol-75-179-s001.pdf [file jamaneurol-75-179-s001.pdf]

## Supplementary Online Content

Shin Y-W, Park K-I, Moon J, et al. Association of bone mineral density with the risk of intracranial aneurysm. *JAMA Neurol*. Published online October 16, 2017. doi:10.1001/jamaneurol.2017.3431

**eFigure.** Flowchart Detailing the Inclusion and Exclusion Criteria and Numbers of the Study Subjects

**eTable 1.** Logistic Regression Analyses of the Relationship Between BMD and IA Size Larger Than 3 mm in At-Risk Population (Tertile 3 vs Tertile 1-2)

**eTable 2.** Logistic Regression Analyses of the Relationship Between BMD and Multiplicity of IA (Tertile 3 vs Tertile 1-2)

**eTable 3.** Linear Regression Analyses of the Relationship Between Low T-score and Log Size of IA in At-risk Population

This supplementary material has been provided by the authors to give readers additional information about their work.

**eFigure.** Flowchart detailing the inclusion and exclusion criteria and numbers of the study subjects

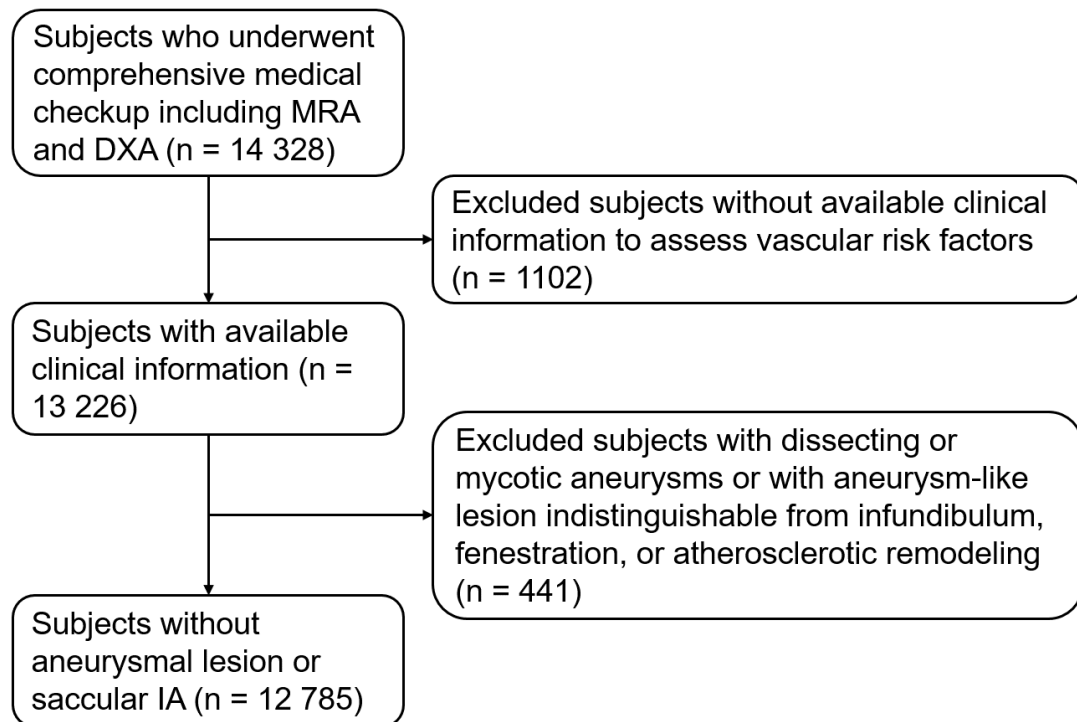

**eTable 1.** Logistic regression analyses of the relationship between BMD and IA size larger than 3 mm in at-risk population (tertile 3 vs tertile 1-2)

|                    | Unadjusted       |         | Adjusted for Age and Sex |         | Adjusted for All Covariates |         |
|--------------------|------------------|---------|--------------------------|---------|-----------------------------|---------|
|                    | OR (95% CI)      | P Value | OR (95% CI)              | P Value | OR (95% CI)                 | P Value |
| Total population   |                  |         |                          |         |                             |         |
| Lumbar spine       | 2.27 (1.53–3.36) | <.001   | 2.28 (1.54–3.38)         | <.001   | 2.22 (1.49–3.31)            | <.001   |
| Femoral neck       | 1.51 (1.02–2.23) | .04     | 1.51 (1.02–2.24)         | .04     | 1.54 (1.03–2.30)            | .03     |
| Total hip          | 1.24 (0.84–1.83) | .29     | 1.24 (0.83–1.83)         | .29     | 1.26 (0.85–1.88)            | .25     |
| At-risk population |                  |         |                          |         |                             |         |
| Lumbar spine       | 2.62 (1.71–4.02) | <.001   | 2.66 (1.74–4.10)         | <.001   | 2.69 (1.74–4.19)            | <.001   |
| Femoral neck       | 1.68 (1.10–2.56) | .02     | 1.69 (1.11–2.58)         | .02     | 1.72 (1.12–2.66)            | .01     |
| Total hip          | 1.53 (1.00–2.33) | .048    | 1.54 (1.01–2.35)         | .045    | 1.57 (1.02–2.41)            | .04     |

Abbreviations: BMD, bone mineral density; IA, intracranial aneurysm; OR, odds ratio; CI, confidence interval.

**eTable 2.** Logistic regression analyses of the relationship between BMD and multiplicity of IA (tertile 3 vs tertile 1-2)

|                    | Unadjusted       |         | Adjusted for Age and Sex |         | Adjusted for All Covariates |         |
|--------------------|------------------|---------|--------------------------|---------|-----------------------------|---------|
|                    | OR (95% CI)      | P Value | OR (95% CI)              | P Value | OR (95% CI)                 | P Value |
| Total population   |                  |         |                          |         |                             |         |
| Lumbar spine       | 1.54 (0.91–2.59) | .11     | 1.53 (0.90–2.58)         | .11     | 1.50 (0.88–2.55)            | .13     |
| Femoral neck       | 1.43 (0.84–2.41) | .18     | 1.43 (0.84–2.41)         | .18     | 1.38 (0.81–2.35)            | .23     |
| Total hip          | 1.43 (0.84–2.41) | .18     | 1.43 (0.84–2.41)         | .18     | 1.42 (0.83–2.40)            | .20     |
| At-risk population |                  |         |                          |         |                             |         |
| Lumbar spine       | 1.57 (0.90–2.73) | .11     | 1.57 (0.90–2.73)         | .11     | 1.57 (0.88–2.76)            | .12     |
| Femoral neck       | 1.45 (0.83–2.53) | .19     | 1.45 (0.83–2.52)         | .19     | 1.42 (0.80–2.48)            | .23     |
| Total hip          | 1.34 (0.76–2.33) | .30     | 1.34 (0.76–2.33)         | .31     | 1.34 (0.76–2.36)            | .31     |

Abbreviations: BMD, bone mineral density; IA, intracranial aneurysm; OR, odds ratio; CI, confidence interval.

**eTable 3.** Linear regression analyses of the relationship between low T-score and log size of IA in at-risk population

|       | Unadjusted    |                | Adjusted for Age and Sex |                | Adjusted for All Covariates |                |
|-------|---------------|----------------|--------------------------|----------------|-----------------------------|----------------|
|       | $\beta$ (SE)  | <i>P</i> value | $\beta$ (SE)             | <i>P</i> Value | $\beta$ (SE)                | <i>P</i> Value |
| Total | 0.171 (0.050) | .001           | 0.146 (0.051)            | .005           | 0.137 (0.051)               | .008           |
| Women | 0.150 (0.063) | .02            | 0.140 (0.065)            | .03            | 0.140 (0.065)               | .03            |
| Men   | 0.145 (0.085) | .09            | 0.146 (0.086)            | .09            | 0.124 (0.087)               | .16            |

Abbreviations: BMD, bone mineral density; IA, intracranial aneurysm;  $\beta$ , non-standardized regression coefficient; SE, standard error.
